# Supplementary material for: Evaluation of Atmospheric Features in Natural Disasters due Frontal Systems over Southern Brazil
Source: MDPI journal article supplement (doi:10.3390/atmos13111886), 2022-11-11
Supplement: s1 [file s1]

# Supplementary Materials: Evaluation of Atmospheric Features in Natural Disasters due Frontal Systems over Southern Brazil

Jean Souza dos Reis <sup>1,2,\*</sup>, Weber Andrade Gonçalves <sup>1</sup>, Diego Oliveira de Souza <sup>3</sup> and David Mendes <sup>1</sup>

<sup>1</sup> Climate Sciences Post-Graduate Program, Department of Climate and Atmospheric Sciences, Federal University of Rio Grande do Norte, Av. Senador Salgado Filho 3000, Lagoa Nova, Natal 59078-970, Brazil

<sup>2</sup> SENAI Institute of Innovation—Renewable Energies, Av. Capitão Mor-Gouveia 2770, Lagoa Nova, Natal 59063-400, Brazil

<sup>3</sup> National Center for Monitoring and Early Warning of Natural Disasters, Estrada Doutor Altino Bondesan, 500, Distrito de Eugênio de Melo, São José dos Campos, São Paulo 12247-016, Brazil

\* Correspondence: jean.reis@ufrn.br

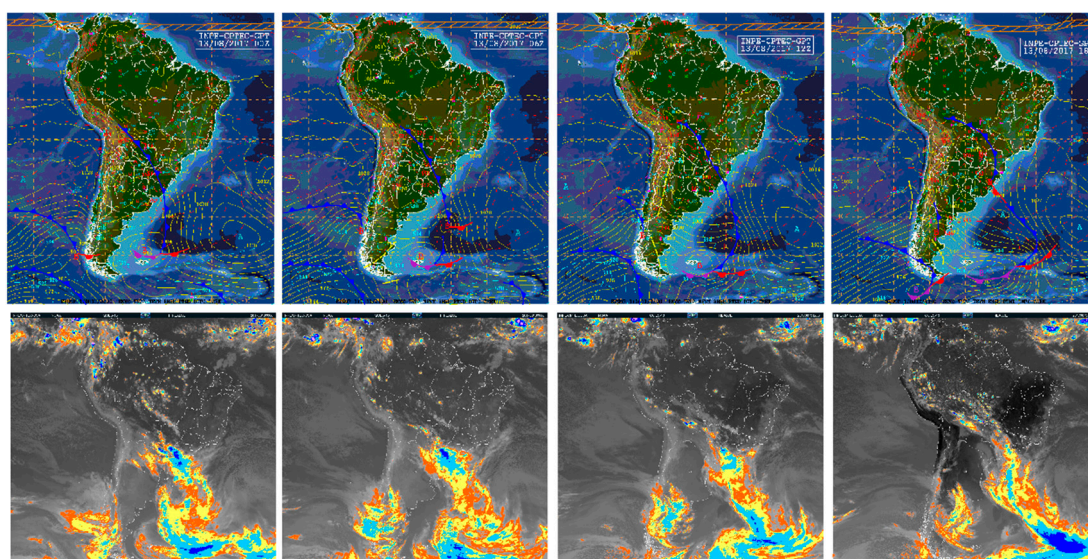

**Figure S1.** Surface synoptic charts (top panel) and satellite image (bottom panel) of October 13, 2017, one of the NDs analyzed in this work.

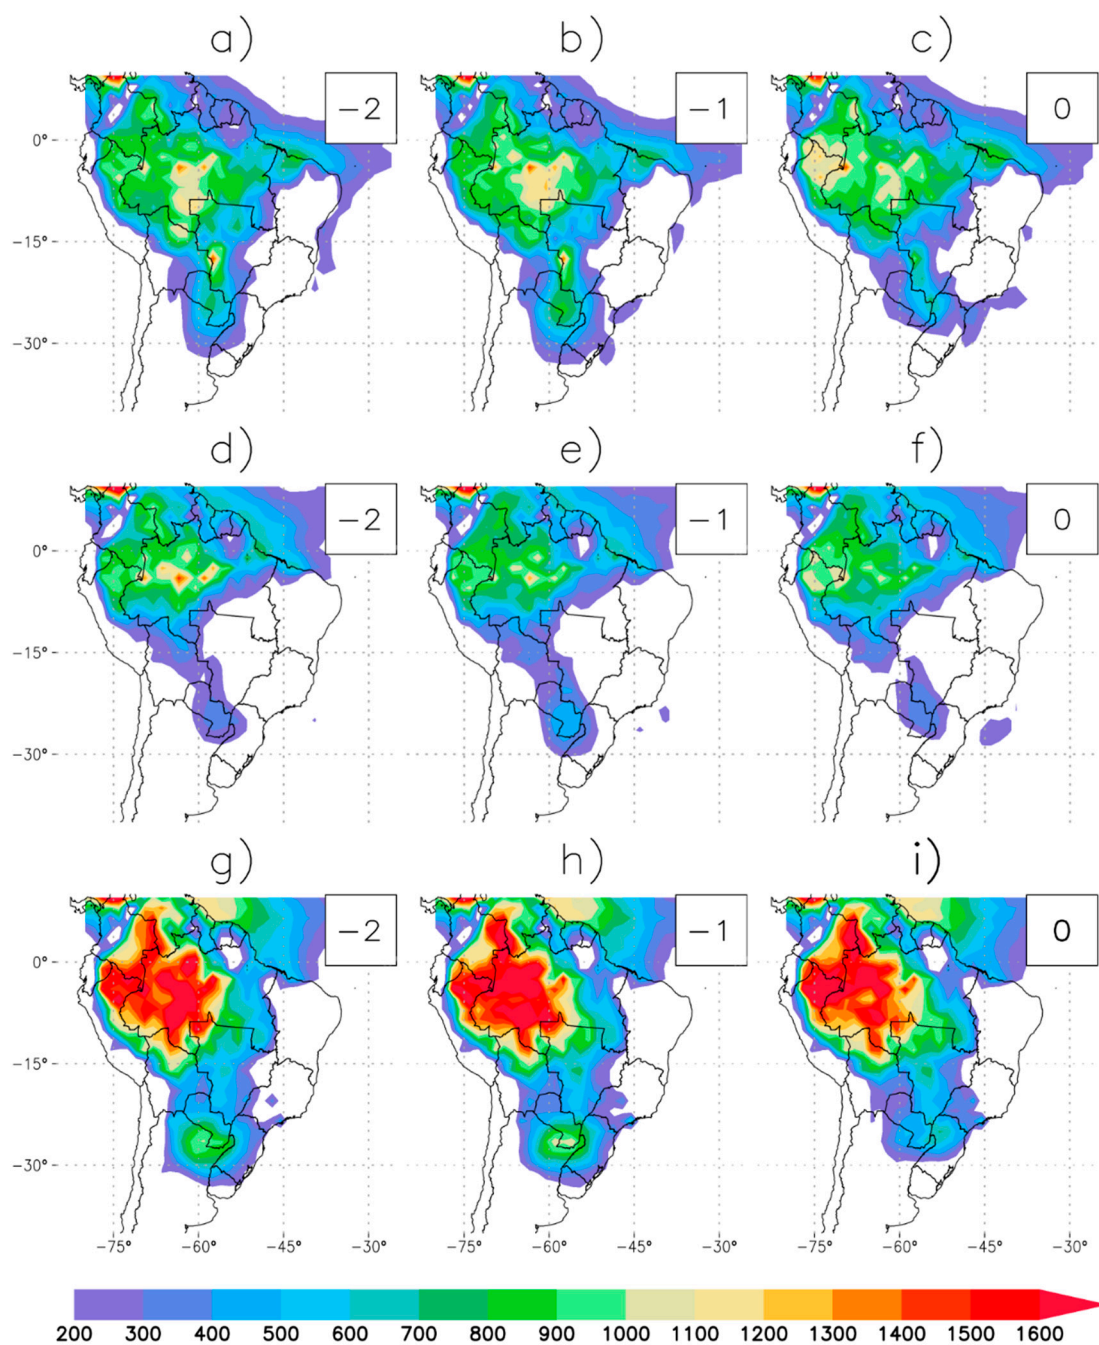

**Figure S2.** Composites of the available convective potential energy average fields (CAPE, in  $\text{J kg}^{-1}$ ) in autumn (a, b, c), winter (d, e, f) and spring (g, h, i) at 2 days before (-2), 1 day before (-1) and the day of the event (0).

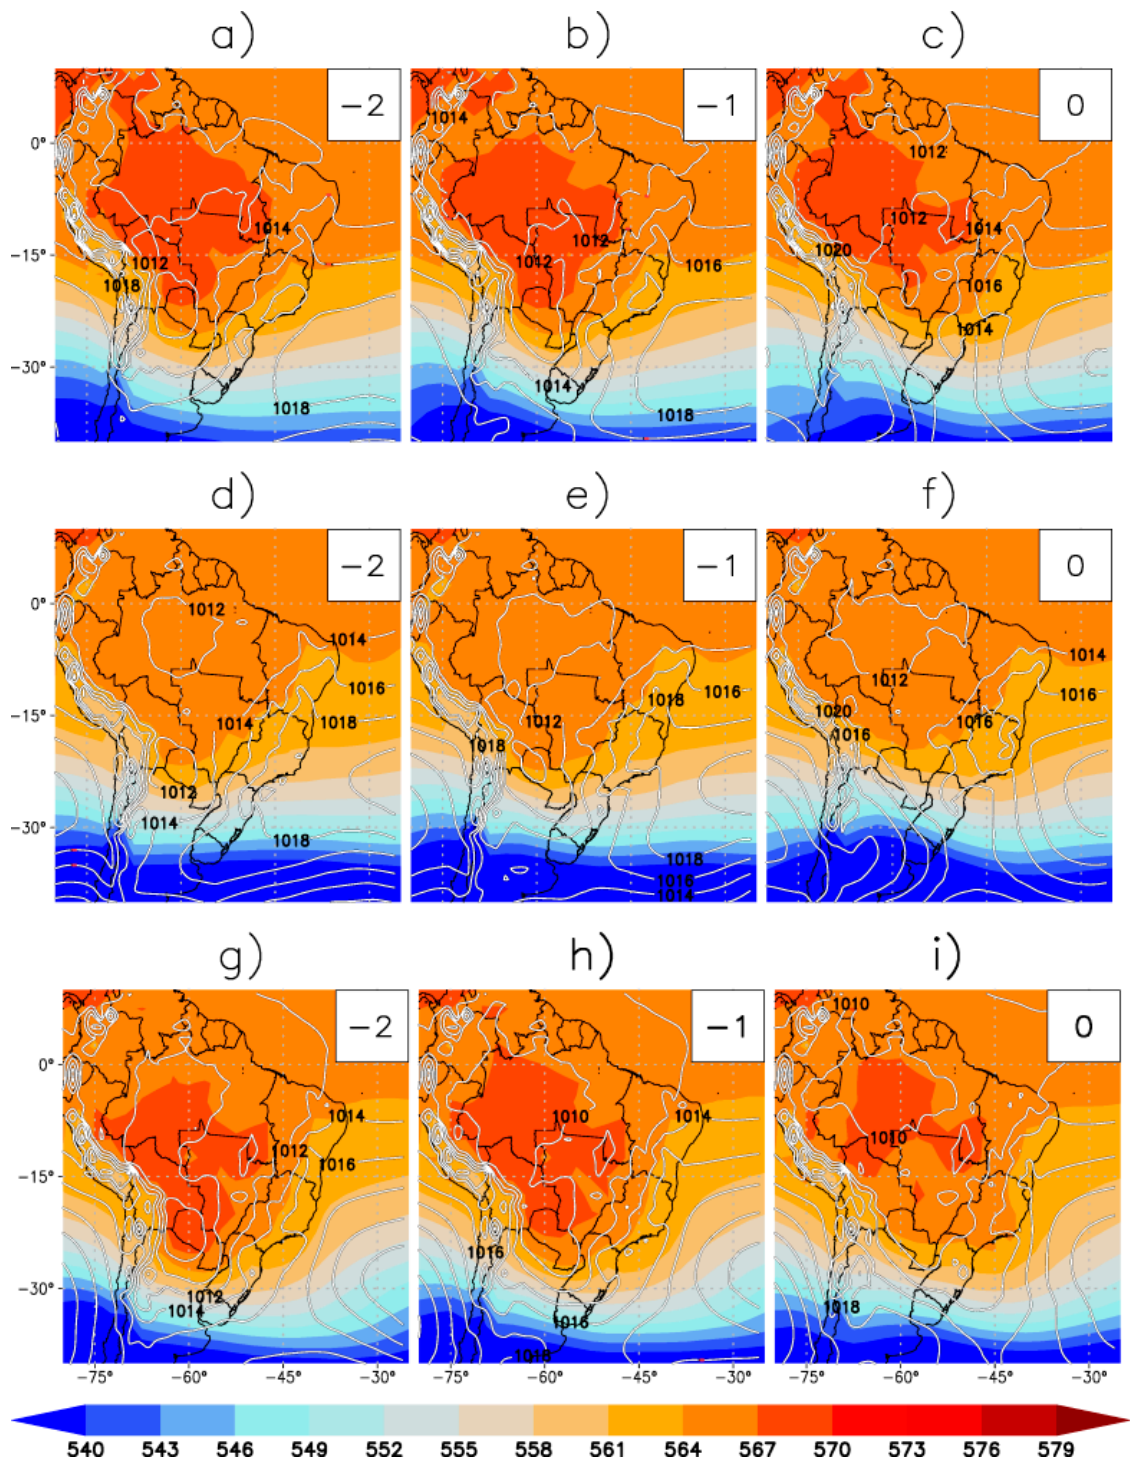

**Figure S3.** Composites of the mean sea level pressure (isolines, hPa) and layer thickness average fields (500 – 1000 hPa, hatched) in autumn (a, b, c), winter (d, e, f) and spring (g, h, i) at 2 days before (-2), 1 day before (-1) and the day of the event (0).



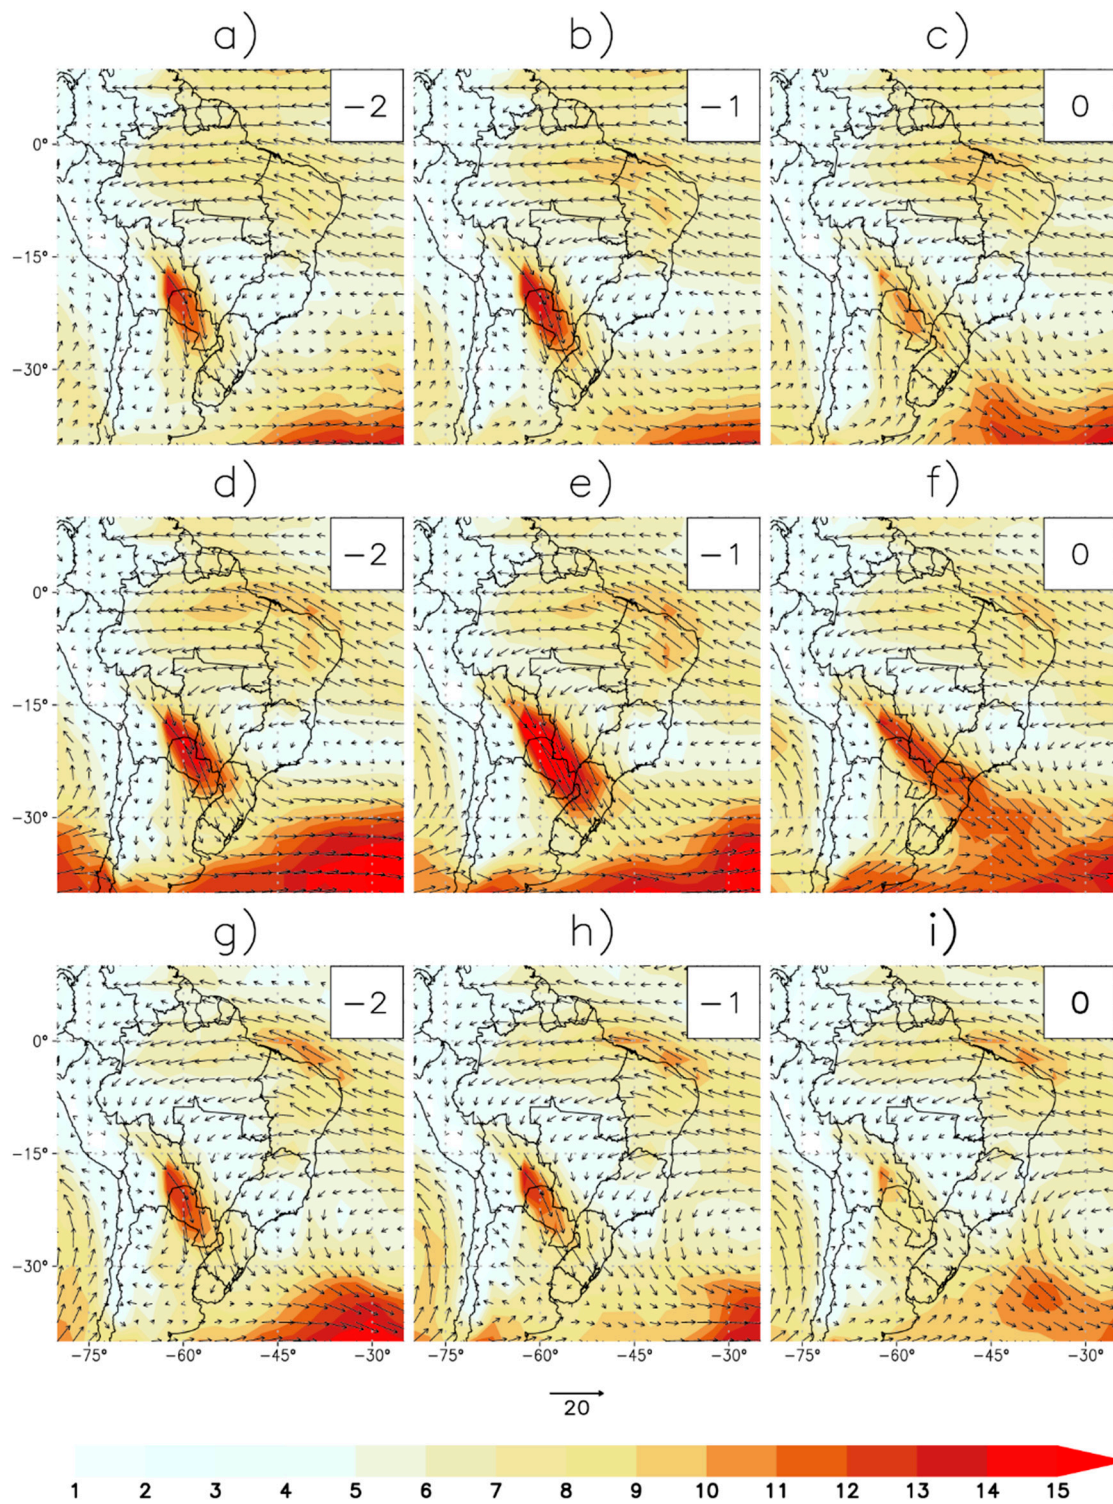

**Figure S4.** Composites of wind speed average fields (hatched in  $\text{m s}^{-1}$ ) and wind (arrows) at 850 hPa level in autumn (a, b, c), winter (d, e, f) and spring (g, h, i) at 2 days before (-2), 1 day before (-1) and the day of the event (0).



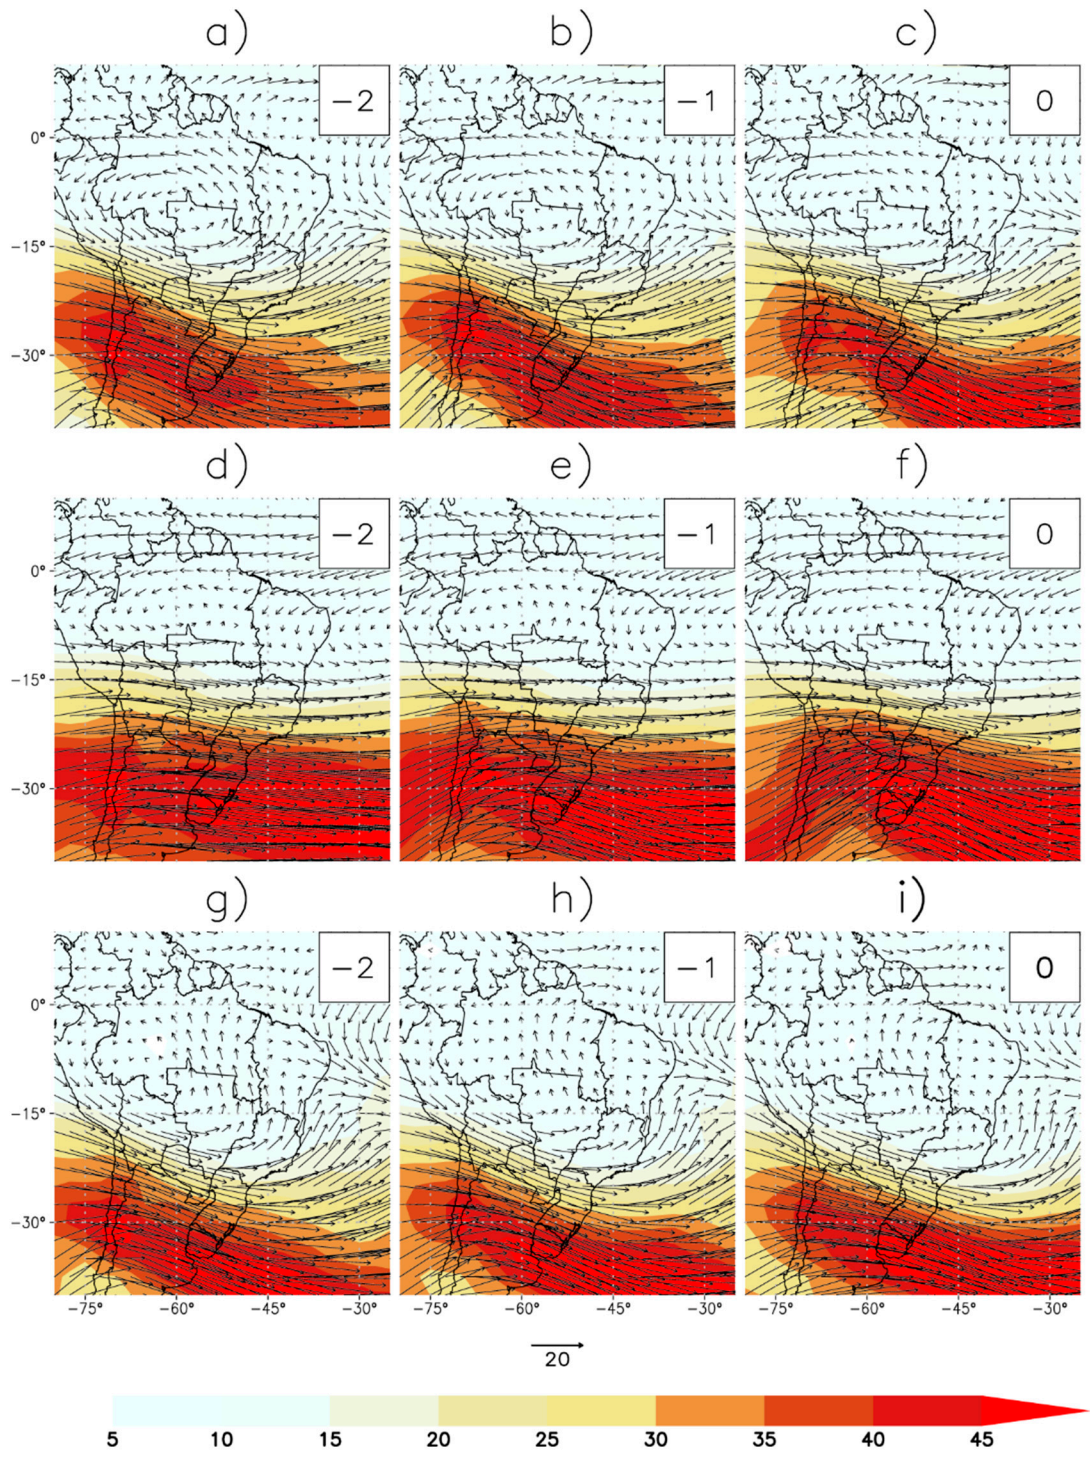

**Figure S5.** Similar to figure S4, but at 250 hPa level.
